# Supplementary material for: Perceptions and Expectations of Youth Regarding the Respect for Their Rights in the Hospital
Source: MDPI journal article supplement (doi:10.3390/children11020222), 2024-02-09
Supplement: s1 [file s1]

**Table S3** Questionnaire 12-18 Years Standard 2 : Equality And Non-Discrimination

| <b>STANDARD 2: EQUALITY AND NON-DISCRIMINATION</b>                                                                                                                                                         | <b>% YES <math>\mu</math> (<math>\pm</math> SD)</b> | <b>% NO <math>\mu</math> (<math>\pm</math> SD)</b> | <b>% ? / N.A. <math>\mu</math> (<math>\pm</math> SD)</b> |
|------------------------------------------------------------------------------------------------------------------------------------------------------------------------------------------------------------|-----------------------------------------------------|----------------------------------------------------|----------------------------------------------------------|
| 2.1. The hospital/health service fulfils the rights of access of all children without discrimination of any kind.                                                                                          |                                                     |                                                    |                                                          |
| 2.1.1. Do you think that everyone in this hospital/health service is treated equally?                                                                                                                      | 84,86 ( $\pm$ 8,34)                                 | 6,57 ( $\pm$ 4,99)                                 | 8,57 ( $\pm$ 5,74)                                       |
| 2.2. The hospital/health service delivers a patient-centred care, which recognises not only the child's individuality and diverse circumstances and needs, but also those of his or her parents or carers. |                                                     |                                                    |                                                          |
| 2.2.1. Were you treated with respect?                                                                                                                                                                      | 97,43 ( $\pm$ 1,89)                                 | 0,00 ( $\pm$ 0,00)                                 | 2,57 ( $\pm$ 1,89)                                       |
| 2.2.2. Do the health professionals always use your preferred name?                                                                                                                                         | 76,57 ( $\pm$ 9,20)                                 | 14,00 ( $\pm$ 7,64)                                | 9,43 ( $\pm$ 5,36)                                       |
| 2.2.3. If you needed, did the hospital/health service offer you translation services?                                                                                                                      | 4,86 ( $\pm$ 2,79)                                  | 13,43 ( $\pm$ 6,45)                                | 81,71 ( $\pm$ 7,97)                                      |
| 2.3. The hospital/health service ensures the respect of children's privacy at all times.                                                                                                                   |                                                     |                                                    |                                                          |
| 2.3.1. Were you given the opportunity to be examined by a doctor of the same sex, upon your request?                                                                                                       | 24,29 ( $\pm$ 11,61)                                | 31,14 ( $\pm$ 13,73)                               | 44,57 ( $\pm$ 12,89)                                     |
| 2.3.2. Were you given the opportunity to stay in a single or double room, upon your request?                                                                                                               | 12,00 ( $\pm$ 7,77)                                 | 39,43 ( $\pm$ 14,44)                               | 48,57 ( $\pm$ 13,15)                                     |
| 2.3.3. Were you given information in a private area?                                                                                                                                                       | 67,14 ( $\pm$ 14,07)                                | 21,71 ( $\pm$ 12,69)                               | 11,15 ( $\pm$ 3,99)                                      |
| 2.3.4. Were you examined in a private area?                                                                                                                                                                | 78,57 ( $\pm$ 7,67)                                 | 14,57 ( $\pm$ 6,65)                                | 6,86 ( $\pm$ 2,51)                                       |
| <b>TOTAL RIGHTS</b>                                                                                                                                                                                        | <b>55,71 (<math>\pm</math>7,92)</b>                 | <b>17,61 (<math>\pm</math>8,32)</b>                | <b>26,68 (<math>\pm</math>6,69)</b>                      |
