# Supplementary material for: Perceptions and Expectations of Youth Regarding the Respect for Their Rights in the Hospital
Source: MDPI journal article supplement (doi:10.3390/children11020222), 2024-02-09
Supplement: s1 [file s1]

**Table S6** Questionnaire 12-18 Years Standard 5: Safety And Environment

| <b>STANDARD 5: SAFETY AND ENVIRONMENT</b>                                                                                         | <b>% YES <math>\mu</math> (<math>\pm</math> SD)</b> | <b>% NO <math>\mu</math> (<math>\pm</math> SD)</b> | <b>% ? / N.A. <math>\mu</math> (<math>\pm</math> SD)</b> |
|-----------------------------------------------------------------------------------------------------------------------------------|-----------------------------------------------------|----------------------------------------------------|----------------------------------------------------------|
| 5.1. The hospital/health service infrastructure is designed, furnished and equipped to meet children's safety and mobility needs. |                                                     |                                                    |                                                          |
| 5.1.1. Do you feel safe here?                                                                                                     | 91,71 ( $\pm$ 5,30)                                 | 4,86 ( $\pm$ 4,16)                                 | 3,43 ( $\pm$ 4,54)                                       |
| 5.1.2. If you have mobility restrictions, have you been able to move around all areas of the building easily?                     | 71,71 ( $\pm$ 12,81)                                | 7,14 ( $\pm$ 4,31)                                 | 21,14 ( $\pm$ 10,61)                                     |
| 5.2. The hospital/health service policies and practice support the best possible nutrition for children.                          |                                                     |                                                    |                                                          |
| 5.2.1. Was free food provided to you during hospitalisation?                                                                      | 97,71 ( $\pm$ 3,02)                                 | 2,29 ( $\pm$ 3,02)                                 | 0,00 ( $\pm$ 0,00)                                       |
| 5.2.2. Did it come at the right times for you?                                                                                    | 58,57 ( $\pm$ 11,40)                                | 37,71 ( $\pm$ 10,96)                               | 3,71 ( $\pm$ 2,04)                                       |
| 5.2.3. Did you think the food was healthy?                                                                                        | 85,43 ( $\pm$ 6,24)                                 | 8,29 ( $\pm$ 4,02)                                 | 6,29 ( $\pm$ 4,88)                                       |
| 5.3. The hospital/health service policies and practice a clean environment for children at all times.                             |                                                     |                                                    |                                                          |
| 5.3.1. Do you think it is clean here?                                                                                             | 75,71 ( $\pm$ 9,14)                                 | 16,86 ( $\pm$ 8,72)                                | 7,43 ( $\pm$ 3,73)                                       |
| 5.3.2. Did the health professionals always wash their hands before and after examining or treating you?                           | 51,14 ( $\pm$ 12,86)                                | 6,57 ( $\pm$ 4,27)                                 | 42,29 ( $\pm$ 13,82)                                     |
| <b>TOTAL RIGHTS</b>                                                                                                               | <b>76,00 (<math>\pm</math>8,68)</b>                 | <b>11,96 (<math>\pm</math>5,64)</b>                | <b>12,04 (<math>\pm</math>5,66)</b>                      |
