# Supplementary material for: Perceptions and Expectations of Youth Regarding the Respect for Their Rights in the Hospital
Source: MDPI journal article supplement (doi:10.3390/children11020222), 2024-02-09
Supplement: s1 [file s1]

**Table S1 .** Question 3 : Who did you play with?

|                   | % $\mu$ ( $\pm$ SD) |
|-------------------|---------------------|
| Parents/Relatives | 22,9 ( $\pm$ 15)    |
| Teacher           | 11,1 ( $\pm$ 21,97) |
| Volunteers        | 15,5 ( $\pm$ 14,4)  |
| Other Children    | 45,4 ( $\pm$ 23)    |
| Alone             | 3.8 ( $\pm$ 4,8)    |
| Doctors           | 0.9 ( $\pm$ 1.5)    |
