# Supplementary material for: Perceptions and Expectations of Youth Regarding the Respect for Their Rights in the Hospital
Source: MDPI journal article supplement (doi:10.3390/children11020222), 2024-02-09
Supplement: s1 [file s1]

---

**SUPPLEMENTARY FILE 1 Children's rights in Hospital and Health Services:  
Assessment Tool for Children aged 6-11 - Edited by: Ana Isabel F. Guerreiro March 2012**

---

**1. Can you please let us know how your stay in hospital was for you?**

Comments

Yes

No

Not applicable/ don't know

**2. Did you play while you were in hospital?**

Comments

Yes

No

Not applicable/ don't know

**3. Who did you play with?**

Comments

Yes

No

Not applicable/ don't know

**4. Did you have the opportunity of going to school in the hospital?**

Comments

Yes

No

Not applicable/ don't know

**5. Do you like the school in the hospital?**

Comments

Yes

No

Not applicable/ don't know

**6. Did anyone tell you why you came to hospital?**

Comments

Yes

No

Not applicable/ don't know

**7. Did the doctor explain why you were hurting / what was wrong with you?**

Comments

Yes

No

Not applicable/ don't know

**8. Did you understand what s/he said?**

Comments

Yes

No

Not applicable/ don't know

**9. Did someone tell you how you can get better?**

Comments

Yes  
No  
Not applicable/ don't know

**10. Do you feel comfortable saying if something is making you unhappy in the hospital?**

Comments  
Yes  
No  
Not applicable/ don't know

**11. Do you know who to talk to if you are not happy in the hospital?**

Comments  
Yes  
No  
Not applicable/ don't know

**12. Were your parents always with you during your stay in hospital?**

Comments  
Yes  
No  
Not applicable/ don't know

**13. Did your parents stay in the hospital overnight? Where?**

Comments  
Yes  
No  
Not applicable/ don't know

**14. Have you felt pain while you were in the hospital?**

Comments  
Yes  
No  
Not applicable/ don't know

**15. Did anyone ask you if you were feeling pain?**

Comments  
Yes  
No  
Not applicable/ don't know

**16. Did anyone try to make the pain better?**

Comments  
Yes  
No  
Not applicable/ don't know

**Last question**

What have been the **good things** about the services provided here?

What have been the **bad things** about the services provided being here?

If you were in charge, what are the **first things you would change** to make things better for children and adolescents?

**THANK YOU**

Printed name and initials of Interviewer    Post held    Signature of Interviewer    Date
