# Supplementary material for: Perceptions and Expectations of Youth Regarding the Respect for Their Rights in the Hospital
Source: MDPI journal article supplement (doi:10.3390/children11020222), 2024-02-09
Supplement: s1 [file s1]

| TABLE S8 Types of feeling in 144 children's drawings |                            |                                |
|------------------------------------------------------|----------------------------|--------------------------------|
| FEELING                                              | POSITIVE FEELINGS (N)      | NEGATIVE FEELINGS (N)          |
|                                                      | Joy / Confidence (23)      | Mood fluctuations (17)         |
|                                                      | Welcome / Hospitality (18) | Uncertainty/Anxiety (17)       |
|                                                      | Joy/ Liveliness (15)       | Sadness (14)                   |
|                                                      | Optimism (9)               | Need for protection (9)        |
|                                                      | Stability/Safety (8)       | Closed environment refusal (7) |
|                                                      | Joy/Fun (7)                |                                |
| N TOTAL                                              | 80                         | 64                             |
| %                                                    | 55%                        | 45%                            |
