# Supplementary material for: Perceptions and Expectations of Youth Regarding the Respect for Their Rights in the Hospital
Source: MDPI journal article supplement (doi:10.3390/children11020222), 2024-02-09
Supplement: s1 [file s1]

**Table S4** Questionnaire 12-18 Years Standard 3 : Play And Learning

| <b>STANDARD 3: PLAY AND LEARNING</b>                                                                            | <b>% YES <math>\mu</math> (<math>\pm</math> SD)</b> | <b>% NO <math>\mu</math> (<math>\pm</math> SD)</b> | <b>% ? / N.A. <math>\mu</math> (<math>\pm</math> SD)</b> |
|-----------------------------------------------------------------------------------------------------------------|-----------------------------------------------------|----------------------------------------------------|----------------------------------------------------------|
| 3.1. The hospital/health service ensures the right to play for all children without discrimination of any kind. |                                                     |                                                    |                                                          |
| 3.1.1. Have you been able to relax/play here?                                                                   | 78,57 ( $\pm$ 7,97)                                 | 18,29 ( $\pm$ 8,91)                                | 3,14 ( $\pm$ 2,30)                                       |
| 3.1.2. Was there a Playroom or separate space to play?                                                          | 75,14 ( $\pm$ 16,75)                                | 7,14 ( $\pm$ 3,82)                                 | 17,72 ( $\pm$ 13,72)                                     |
| 3.1.2.1. Are there things to do here for a person of your age?                                                  |                                                     |                                                    |                                                          |
| 3.1.3. Did anyone help you during play if you needed?                                                           | 40,29 ( $\pm$ 14,75)                                | 14,00 ( $\pm$ 3,11)                                | 45,71 ( $\pm$ 12,17)                                     |
| 3.1.4. Did the doctors or nurses use any type of play to help you during examination, treatment or procedures?  | 38,57 ( $\pm$ 15,81)                                | 38,29 ( $\pm$ 13,66)                               | 23,14 ( $\pm$ 12,51)                                     |
| 3.2. The hospital/health service planning takes into account children's views of what is needed.                |                                                     |                                                    |                                                          |
| 3.2.1. Has anyone who works here asked you what you think about the play here?                                  | 11,14 ( $\pm$ 7,61)                                 | 81,43 ( $\pm$ 7,80)                                | 6,29 ( $\pm$ 3,29)                                       |
| 3.3. The hospital/health service provides complementary play and educational activities.                        |                                                     |                                                    |                                                          |
| 3.3.1. Have you been able to continue your school work here?                                                    | 35,71 ( $\pm$ 13,04)                                | 57,71 ( $\pm$ 14,99)                               | 6,57 ( $\pm$ 3,61)                                       |
| 3.3.2. Has anyone told you about how to talk to a teacher here?                                                 | 28,86 ( $\pm$ 12,70)                                | 60,00 ( $\pm$ 16,22)                               | 11,14 ( $\pm$ 3,85)                                      |
| <b>TOTAL RIGHTS</b>                                                                                             | <b>44,04 (<math>\pm</math>12,66)</b>                | <b>39,55 (<math>\pm</math>9,79)</b>                | <b>16,41 (<math>\pm</math>7,35)</b>                      |
