# Supplementary material for: Perceptions and Expectations of Youth Regarding the Respect for Their Rights in the Hospital
Source: MDPI journal article supplement (doi:10.3390/children11020222), 2024-02-09
Supplement: s1 [file s1]

**Table S7** Questionnaire 12-18 Years Standard 6: Pain Management And Palliative Care

| <b>STANDARD 6: PAIN MANAGEMENT AND PALLIATIVE CARE</b>                                                       | <b>% YES <math>\mu</math> (<math>\pm</math> SD)</b> | <b>% NO <math>\mu</math> (<math>\pm</math> SD)</b> | <b>% ? / N.A. <math>\mu</math> (<math>\pm</math> SD)</b> |
|--------------------------------------------------------------------------------------------------------------|-----------------------------------------------------|----------------------------------------------------|----------------------------------------------------------|
| 6.1. The hospital/health service policy ensures the prevention and management of pain.                       |                                                     |                                                    |                                                          |
| 6.1.1. Were you in pain here?                                                                                | 65,43 ( $\pm$ 11,63)                                | 31,71 ( $\pm$ 11,82)                               | 2,86 ( $\pm$ 1,25)                                       |
| 6.1.2. Were you given any treatment for this pain?                                                           | 78,29 ( $\pm$ 9,46)                                 | 10,57 ( $\pm$ 3,25)                                | 11,14 ( $\pm$ 7,04)                                      |
| 6.1.3. Was anything else been done to make you feel more comfortable if you have pain (apart from medicine)? | 68,86 ( $\pm$ 12,29)                                | 18,00 (6,81)                                       | 13,14 (7,91)                                             |
| 6.1.4. Did the health professionals ask you if you have pain?                                                | 94,57 ( $\pm$ 5,50)                                 | 5,43 ( $\pm$ 5,50)                                 | 0,00 ( $\pm$ 0,00)                                       |
| <b>TOTAL RIGHTS</b>                                                                                          | <b>76,79 (<math>\pm</math>9,89)</b>                 | <b>16,43 (<math>\pm</math>6,85)</b>                | <b>6,79 (<math>\pm</math>4,05)</b>                       |
