# Supplementary material for: Perceptions and Expectations of Youth Regarding the Respect for Their Rights in the Hospital
Source: MDPI journal article supplement (doi:10.3390/children11020222), 2024-02-09
Supplement: s1 [file s1]

**Table S5** Questionnaire 12-18 Years Standard 4: Information And Participation

| STANDARD 4: INFORMATION AND PARTICIPATION                                                                                                                                                        | % YES $\mu$ ( $\pm$ SD) | % NO $\mu$ ( $\pm$ SD) | % ? / N.A. $\mu$ ( $\pm$ SD) |
|--------------------------------------------------------------------------------------------------------------------------------------------------------------------------------------------------|-------------------------|------------------------|------------------------------|
| 4.1. The hospital/health service ensures an environment based on trust, information-sharing, the capacity to listen and sound guidance that is conducive to the child's effective participation. |                         |                        |                              |
| 4.1.1. Did you receive any information about your right to express your views and how this participation will take place?                                                                        | 29,14 ( $\pm$ 11,94)    | 63,43 ( $\pm$ 11,48)   | 7,43 ( $\pm$ 3,55)           |
| 4.1.1.1. Have you been told that it is alright to ask the health professionals questions?                                                                                                        | 74,00 ( $\pm$ 7,87)     | 19,71 ( $\pm$ 7,47)    | 6,29 ( $\pm$ 3,82)           |
| 4.1.1.2. Have you been told it is alright to tell the health professionals how you are feeling?                                                                                                  | 96,00 ( $\pm$ 4,47)     | 4,00 ( $\pm$ 4,47)     | 0,00 ( $\pm$ 0,00)           |
| 4.1.1.3. Have your thoughts and opinions been asked for and listened to?                                                                                                                         | 86,57 ( $\pm$ 6,32)     | 5,71 ( $\pm$ 3,39)     | 7,71 ( $\pm$ 2,38)           |
| 4.1.2. Did all hospital/health service professionals introduce themselves to you and did they wear a name badge?                                                                                 | 91,71 ( $\pm$ 5,24)     | 4,86 ( $\pm$ 4,31)     | 3,43 ( $\pm$ 3,10)           |
| 4.1.3. Were you informed about your possibility to give informed consent to treatment?                                                                                                           | 62,86 ( $\pm$ 13,50)    | 25,43 ( $\pm$ 12,98)   | 11,71 ( $\pm$ 3,02)          |
| 4.1.4. Did you give your informed consent for treatment ( <i>if you are old enough according to hospital/health service policy</i> )?                                                            | 63,43 ( $\pm$ 10,24)    | 25,71 ( $\pm$ 12,10)   | 10,86 ( $\pm$ 7,72)          |
| 4.1.5. If you wanted to make a complaint about something here, would you know how to do that?                                                                                                    | 56,57 ( $\pm$ 6,34)     | 34,86 ( $\pm$ 6,92)    | 8,57 ( $\pm$ 5,67)           |
| 4.2. The hospital/health service ensures that all appropriate staff has the skills to engage in dialogue and information-sharing with children of all ages and maturity.                         |                         |                        |                              |
| 4.2.1. Did you understand everything that you were told by the health professionals?                                                                                                             | 64,57 ( $\pm$ 15,76)    | 30,57 ( $\pm$ 13,74)   | 4,86 ( $\pm$ 3,26)           |
| 4.2.2. Do you think that you were given enough information about what is wrong with you and what treatment you might need?                                                                       | 77,43 ( $\pm$ 9,11)     | 18,00 ( $\pm$ 10,82)   | 4,57 ( $\pm$ 4,82)           |
| 4.3. The hospital/health service consults with children about their well being and about the development and improvement of health care services.                                                |                         |                        |                              |
| 4.3.1. Have you ever participated in a consultation or other programme for evaluation and/or improving health care services?                                                                     | 16,86 ( $\pm$ 8,16)     | 79,14 ( $\pm$ 8,18)    | 4,00 ( $\pm$ 2,65)           |
| 4.3.1.1. If <i>yes</i> , did you receive clear feedback about how your contributions were used and/or influenced any outcomes?                                                                   | 9,14 ( $\pm$ 6,90)      | 62,29 ( $\pm$ 16,78)   | 28,57 ( $\pm$ 16,94)         |
| 4.3.1.2. If <i>yes</i> , did you feel your contributions influenced decisions?                                                                                                                   | 17,43 ( $\pm$ 9,98)     | 49,43 ( $\pm$ 13,49)   | 33,14 ( $\pm$ 16,69)         |
| TOTAL RIGHTS                                                                                                                                                                                     | 57,36 ( $\pm$ 8,91)     | 32,55 ( $\pm$ 9,70)    | 10,09 ( $\pm$ 5,66)          |
