# Supplementary material for: Perceptions and Expectations of Youth Regarding the Respect for Their Rights in the Hospital
Source: MDPI journal article supplement (doi:10.3390/children11020222), 2024-02-09
Supplement: s1 [file s1]

**Table S2** Questionnaire 12-18 Years Standard 1: Quality Services For Children

| STANDARD 1: QUALITY SERVICES FOR CHILDREN                                                                                                   | % YES $\mu$ ( $\pm$ SD) | % NO $\mu$ ( $\pm$ SD) | % ? / N.A. $\mu$ ( $\pm$ SD) |
|---------------------------------------------------------------------------------------------------------------------------------------------|-------------------------|------------------------|------------------------------|
| 1.1.1. Do you think that you received the best care here?                                                                                   | 92,00 ( $\pm$ 4,62)     | 1,14 ( $\pm$ 1,51)     | 6,86 ( $\pm$ 4,86)           |
| 1.1.2. Do you feel you are included in planning your own care?                                                                              | 79,71 ( $\pm$ 8,05)     | 11,71 ( $\pm$ 5,24)    | 8,57 ( $\pm$ 3,73)           |
| 1.1.3. Have you been given any advice/information about keeping yourself healthy in future?                                                 | 79,43 ( $\pm$ 9,09)     | 9,14 ( $\pm$ 3,30)     | 11,43 ( $\pm$ 4,86)          |
| 1.2. The hospital/health service ensures that all types of services provided within the organisation are regularly monitored and evaluated. |                         |                        |                              |
| 1.2.1. Has anyone who works here asked you what you think about the services and care?                                                      | 20,57 ( $\pm$ 9,84)     | 76,86 (11,07)          | 2,57 ( $\pm$ 2,30)           |
| 1.2.1.1. If <i>yes</i> , did anyone tell you how they would use the information you gave?                                                   | 8,29 ( $\pm$ 2,41)      | 83,42 (7,61)           | 8,29 ( $\pm$ 5,62)           |
| 1.3. The hospital/health service has a Charter on Children's Rights, in line with the United Nations Convention on the Rights of the Child. |                         |                        |                              |
| 1.3.1. Have you been given a copy of a Charter on Children's Rights in hospital/health service?                                             | 9,14 ( $\pm$ 8,85)      | 85,14 (12,00)          | 5,72 ( $\pm$ 4,91)           |
| 1.3.2. Have you seen anything in the hospital that explains your rights?                                                                    | 18,00 ( $\pm$ 10,60)    | 78,86 (12,25)          | 3,14 ( $\pm$ 2,15)           |
| 1.3.3. Has any health worker talked to you about your rights?                                                                               | 14,57 ( $\pm$ 9,01)     | 83,14 (10,66)          | 2,29 ( $\pm$ 1,86)           |
| 1.4. The hospital provides the possibility for parents/carers to stay with their child at all times during hospitalisation.                 |                         |                        |                              |
| 1.4.1. Did you want your parent to stay with you?                                                                                           | 96,29 ( $\pm$ 4,49)     | 2,00 (2,65)            | 1,71 ( $\pm$ 1,86)           |
| 1.4.2. If <i>yes</i> , did your parent stay with you all the time (including at night)?                                                     | 96,86 ( $\pm$ 4,16)     | 3,14 (4,16)            | 0,00 ( $\pm$ 0,00)           |
| 1.4.3. Did your parent stay with you during procedures (i.e. injections, blood extractions, etc)?                                           | 95,43 ( $\pm$ 3,95)     | 4,00 (4,04)            | 0,57 ( $\pm$ 0,76)           |
| 1.4.4. If you had an operation, did your parent stay with you until you went to sleep (anaesthetised)?                                      | 56,57 ( $\pm$ 20,12)    | 16,29 (10,65)          | 27,14 ( $\pm$ 17,63)         |
| 1.4.4.1. If <i>no</i> , would you have liked them to stay?                                                                                  | 77,71 ( $\pm$ 17,77)    | 4,57 (3,73)            | 17,72 ( $\pm$ 18,22)         |
| 1.4.5. Are you allowed to have your mobile phone or laptop with you?                                                                        | 96,00 ( $\pm$ 4,47)     | 2,00 (2,65)            | 2,00 ( $\pm$ 1,91)           |

|                                                                                                     |                                      |                                      |                                     |
|-----------------------------------------------------------------------------------------------------|--------------------------------------|--------------------------------------|-------------------------------------|
| 1.5. The hospital/health service pays special attention to the rights of adolescents to healthcare. |                                      |                                      |                                     |
| 1.5.1. Did you use a medical service without a parent/carer?                                        | 7,71 ( $\pm 3,67$ )                  | 89,43 (5,19)                         | 2,86 ( $\pm 1,90$ )                 |
| 1.5.2. Can you get there by bus or train?                                                           | 58,00 ( $\pm 15,37$ )                | 8,00 (1,91)                          | 34,00 ( $\pm 15,73$ )               |
| 1.5.3. Were the people you met friendly?                                                            | 94,00 ( $\pm 3,79$ )                 | 2,29 (2,27)                          | 3,71 ( $\pm 1,91$ )                 |
| 1.5.4. Are you happy with the service that was provided to you?                                     | 90,29 ( $\pm 6,62$ )                 | 2,29 (1,57)                          | 7,42 ( $\pm 3,78$ )                 |
| 1.5.5. Do you feel that your privacy is respected in all aspects of care and treatment?             | 89,71 ( $\pm 5,73$ )                 | 4,00 (2,24)                          | 6,29 ( $\pm 3,70$ )                 |
| 1.5.6. Do you feel that your confidentiality is protected in all aspects of care and treatment?     | 87,71 ( $\pm 7,80$ )                 | 3,43 ( $\pm 2,36$ )                  | 8,86 ( $\pm 6,02$ )                 |
| TOTAL RIGHTS                                                                                        | <b>63,40 (<math>\pm 8,05</math>)</b> | <b>28,54 (<math>\pm 5,35</math>)</b> | <b>8,06 (<math>\pm 5,19</math>)</b> |
